# Supplementary material
Source: PubMed Central journal article supplement (PMC3932240)

**Supplementary Table 1:** *TeCpcS* Identity and Similarity Scores

|                                               | <i>SCpcS-I</i> <sup>a</sup> | <i>SCpcU-I</i> | <i>NCpcS-III</i> | <i>PCpcS-II</i> | <i>FdCpcS-I</i> |
|-----------------------------------------------|-----------------------------|----------------|------------------|-----------------|-----------------|
| <i>TeCpcS-III</i><br>Identity<br>Scores (%)   | 45.5                        | 28.9           | 64.1             | 25.1            | 43.0            |
| <i>TeCpcS-III</i><br>Similarity<br>Scores (%) | 60.6                        | 44.7           | 74.0             | 45.5            | 59.7            |

<sup>a</sup> Species designations are as follows: *TeCpcS-III* from *Thermosynechococcus elongatus*; *SCpcS-I* from *Synechococcus* sp. PCC 7002; *SCpcU-I* from *Synechococcus* sp. PCC 7002; *NCpcS-III* from *Nostoc* sp. PCC 7120; *PCpcS-II* from *Prochlorococcus marinus*; *FdCpcS-I* from *Fremyella diplosiphon*

### Supplementary Figure Legends:

**Supplementary Fig. 1.** Analysis of purified HT-CpcB chromophorylated by *TeCpcS* in recombinant *E. coli*. **(A)** Absorbance (solid) and fluorescence emission (dashed) spectra of HT-CpcBA purified from recombinant *E. coli* cells containing pCpcBA, p*TeCpcS* and either pPebS (red) or pHy2 (green). **(B)** Coomassie-stained SDS-polyacrylamide gel of HT-CpcBA purified from cells containing pCpcBA, p*TeCpcS* and either pPebS (lane 1), or pHy2 (lane 2). Molecular mass standards were loaded in lane S. **(C)** Zn-enhanced bilin fluorescence of the gel in panel B excited at 532 nm to detect PEB covalent attachment. **(D)** Zn-enhanced bilin fluorescence of the gel in panel B excited at 635 nm to detect PΦB covalent attachment.

**Supplementary Fig. 2.** Attachment of three different bilins (PEB, PCB or PΦB) to AP by *TeCpcS*. Absorbance (solid) and fluorescence emission (dashed) spectra of HT-ApcAB purified from recombinant *E. coli* cells containing pApcAB, p*TeCpcS* and the bilin reductase genes to produce **(A)** PCB from pPcyA, **(B)** PEB from pPebS or **(C)** PΦB from pHy2. **(D)** Coomassie-stained SDS-polyacrylamide gel of HT-ApcAB purified from cells containing pApcAB, p*TeCpcS* and either pPcyA (lane 1), pPebS (lane 2), or pHy2 (lane 3). Molecular mass standards were loaded in lane S. **(E)** Zn-enhanced bilin fluorescence of the gel (excitation at 532 nm) in panel D.

**Supplementary Fig. 3.** Attachment of three different bilins (PEB, PCB or PΦB) to AP-B by *TeCpcS*. Absorbance (solid) and fluorescence emission (dashed) spectra of HT-ApcDB purified from recombinant *E. coli* cells containing pApcDB, p*TeCpcS* and either the bilin reductase genes to produce **(A)** PCB from pPcyA, **(B)** PEB from pPebS or **(C)** PΦB from pHy2. **(D)** Coomassie-stained SDS-polyacrylamide gel of HT-ApcDB purified from cells containing pApcDB, p*TeCpcS* and either pPcyA (lane 1), pPebS (lane 2), or pHy2 (lane 3). Molecular mass standards were loaded in lane S. **(E)** Zn-enhanced bilin fluorescence of the gel (excitation at 532 nm) in panel D.

**Supplementary Fig. 4.** Attachment of PEB, and/or PCB, or PΦB to ApcF **(A)** Absorbance (solid) and fluorescence emission (dashed) spectra of HT-ApcF purified from recombinant *E. coli* cells containing pApcF, p*TeCpcS* and either pPcyA (blue) or pPebS (red). **(B)** Absorbance spectrum (solid purple) of HT-ApcF purified from recombinant *E. coli* cells containing pApcF, p*TeCpcS*, and both pPcyA and pPebS. Fluorescence emission resulting from excitation of this sample at 490 nm (red-dashed line) is attributed to protein-bound PEB. Fluorescence emission resulting from excitation at 590 nm (blue-dashed line) is attributed to protein-bound PCB. **(C)** Absorbance (solid green) and fluorescence emission (dashed green) spectra of HT-ApcF purified

from recombinant *E. coli* cells containing pApcF, p*TeCpcS* and pHy2. **(D)** Coomassie-stained SDS-polyacrylamide gel of HT-ApcF purified from cells containing pApcF, p*TeCpcS* and either pPcyA (lane 1), pPebS (lane 2), both pPcyA and pPebS (lane 3), or pHy2 (lane 4). Molecular mass standards were loaded in lane S. **(E)** Zn-enhanced bilin fluorescence of the gel (excitation at 532 nm) in panel D.

**Supplementary Fig. 5.** MALDI-TOF/TOF MS analysis of the tryptic digest of purified HT-*TeCpcS*-PEB **(A and B)** and HT-*TeCpcS*-PCB **(C and D)**. The structure of each precursor is presented in the corresponding figure inset. Presented are 1 keV ( $E_{\text{LAB}}$ ) collision-induced dissociation (CID) product ion mass spectra of precursors at: **(A)**  $m/z$  2124.9. The product ion at  $m/z$  587 was identified as protonated PEB. The peak at  $m/z$  1538 was matched with a peptide containing a cysteine at position 169. The sequence of the peptide is FGGFSMASFCSEIR. **(B)**  $m/z$  1524.7. The fragment at  $m/z$  938 was matched with a peptide containing a cysteine at position 2 after cleavage of the bilin. The sequence of the peptide is MCIGMDIR. **(C)**  $m/z$  2124.9. The product ion at  $m/z$  587 was identified as protonated PCB. The peak at  $m/z$  1538 was matched with a peptide containing a cysteine at position 169 after cleavage of the bilin. The sequence of the peptide is FGGFSMASFCSEIR. **(D)**  $m/z$  1524.7. The fragment at  $m/z$  938 was matched with a peptide containing a cysteine at position 2 after cleavage of the bilin. The sequence of the peptide is MCIGMDIR.

**Supplementary Fig. 6.** Analysis of *TeCpcS* C2S, C169S, and C2S/C169S variants in the binding and ligation of PCB. **(A)** Absorbance (solid) and fluorescence emission (dashed) spectra of HT-*TeCpcS* purified from recombinant *E. coli* cells containing pPcyA and either pTER13-30 (black), pTER13(C2S) (cyan), pTER13(C169S) (orange), or pTER13(C2S/C169S) (pink). **(B)** Absorbance (solid) and fluorescence emission (dashed) spectra of HT-CpcBA purified from recombinant *E. coli* cells containing pCpcBA and pPcyA with either pTER13-30 (black), pTER13(C2S) (cyan), pTER13(C169S) (orange), or pTER13(C2S/C169S) (pink). **(C)** Coomassie-stained SDS-polyacrylamide gel of HT-*TeCpcS* purified from cells containing pPcyA and either pTER13-30 (lane 1), pTER13(C2S) (lane 2), pTER13(C169S) (lane 3), or pTER13(C2S/C169S) (lane 4); and of HT-CpcBA purified from cells containing pCpcBA and pPcyA with either pTER13-30 (lane 5), pTER13(C2S) (lane 6), pTER13(C169S) (lane 7), or pTER13(C2S/C169S) (lane 8). Molecular mass standards were loaded in lane S. **(E)** Zn-enhanced bilin fluorescence of the gel (excitation at 635 nm) in panel D.

**Supplementary Fig. 7.** Analysis of *TeCpcS* R151G and S155G variants in the binding and ligation of PCB. **(A)** Absorbance (solid) and fluorescence emission (dashed) spectra of HT-*TeCpcS* purified from recombinant *E. coli* cells containing pPcyA and either pTER13-30 (black),

pTER13(R151G) (orange) or pTER13(S155G) (purple). **(B)** Coomassie-stained SDS polyacrylamide gel of HT-*TeCpcS* purified from cells containing pPcyA and pTER13-30 (lane 1), pTER13(R151G) (lane 2) or pTER13(S155G) (lane 3). Molecular mass standards were loaded in lane S. **(C)** Zn-enhanced bilin fluorescence of the gel (excitation at 635 nm) in panel B. **(D)** Absorbance (solid) and fluorescence emission (dashed) spectra of HT-CpcBA purified from recombinant *E. coli* cells containing pCpcBA and pPcyA with pTER13-30 (black), pTER13(R151G) (orange) or pTER13(S155G) (purple). **(E)** Coomassie-stained SDS polyacrylamide gel of HT-CpcBA purified from cells containing pCpcBA and pPcyA with either pTER13-30 (lane 1), pTER13(R151G) (lane 2) or pTER13(S155G) (lane 3). **(F)** Zn-enhanced bilin fluorescence of the gel (excitation at 635 nm) in panel E.

# Supplementary Fig. 1

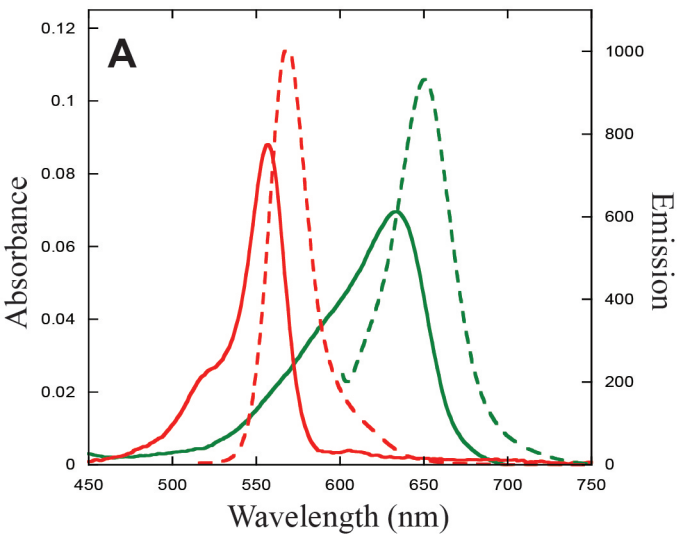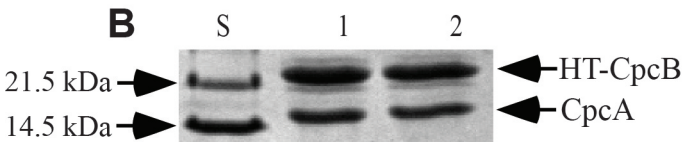

**C**

**D**

Supplementary Fig. 2

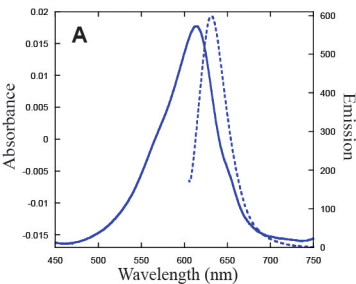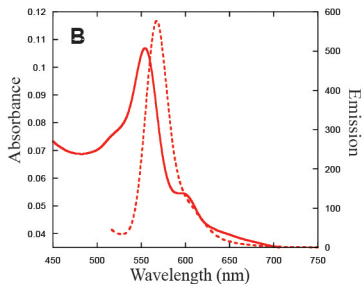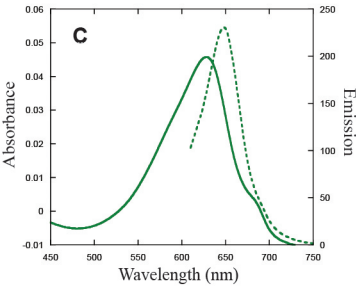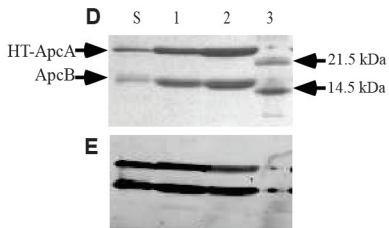

Supplementary Fig. 3

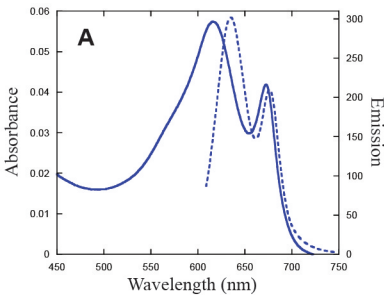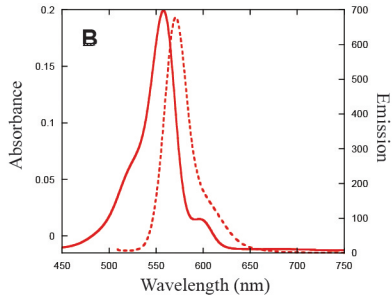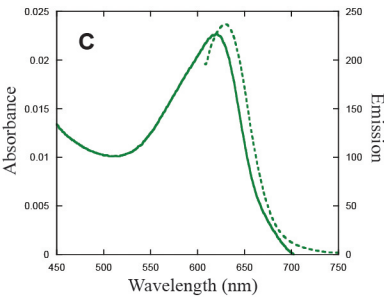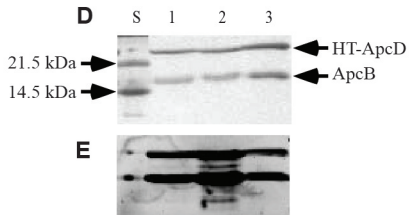

Supplementary Fig. 4

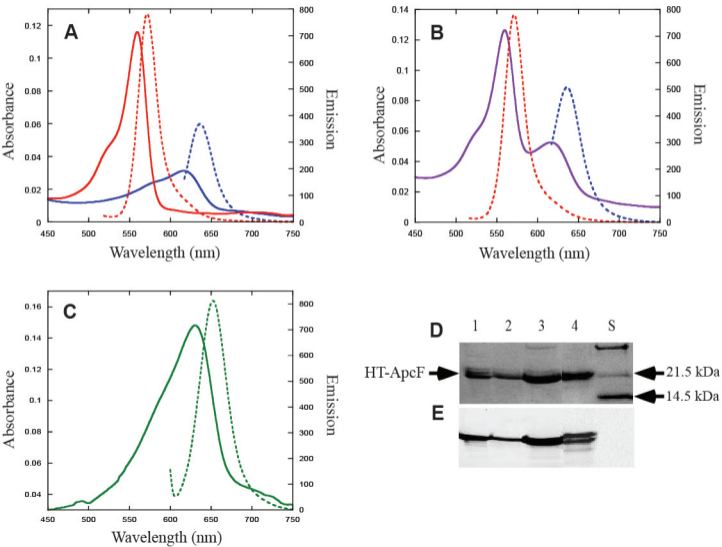



# Supplementary Fig. 5

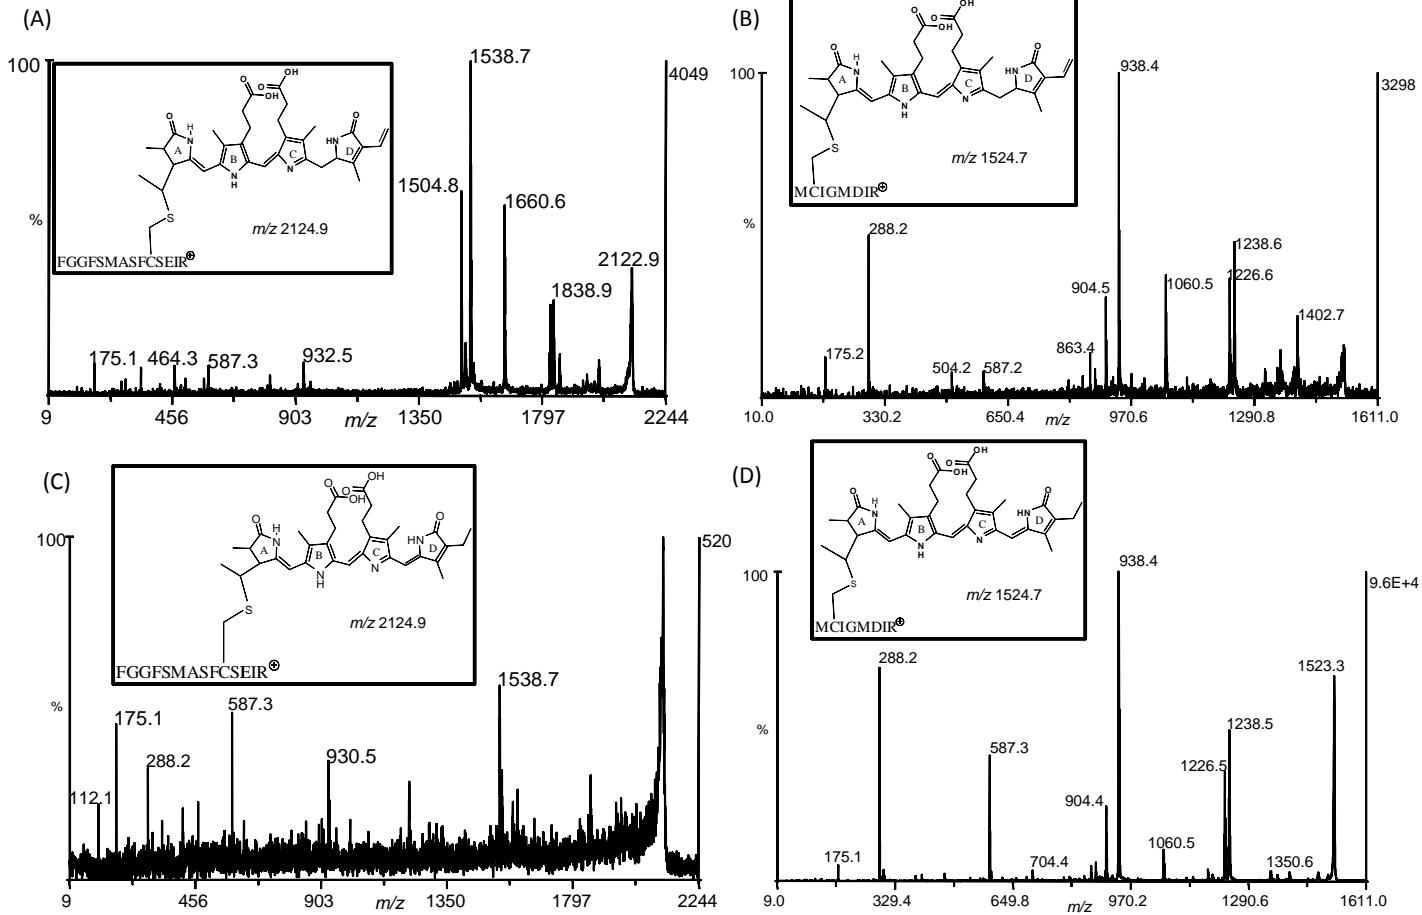

# Supplementary Fig. 6

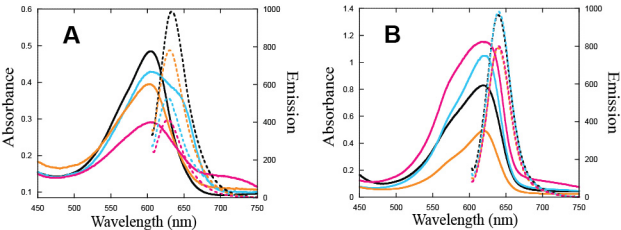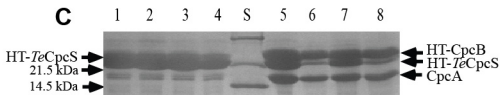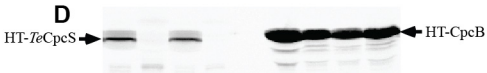

# Supplementary Fig. 7

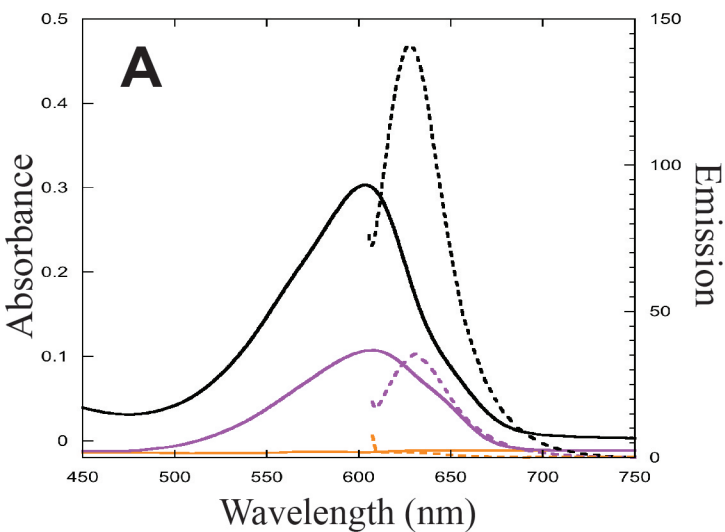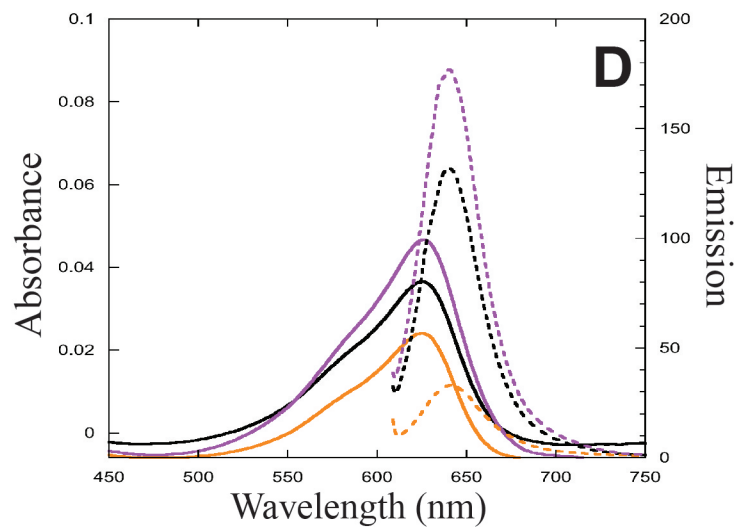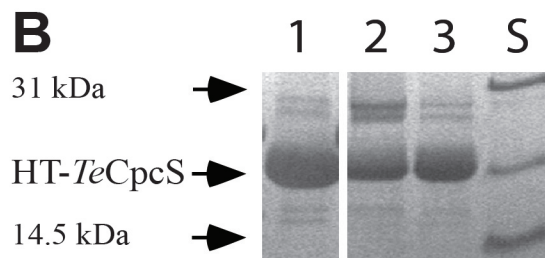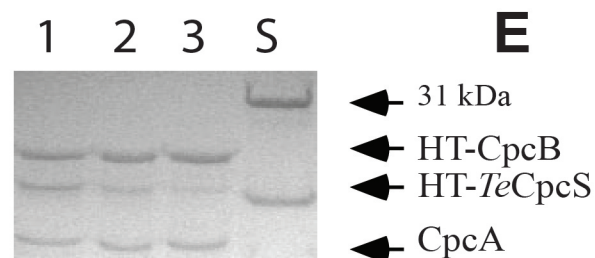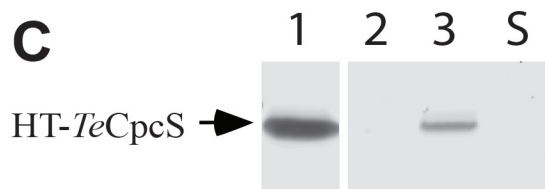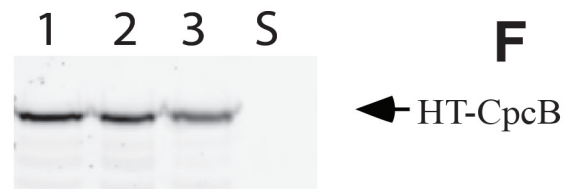

Supplement: NIHMS541442-supplement-1_si_001.pdf [file NIHMS541442-supplement-1_si_001.pdf]
